# Supplementary material for: Multilayer immobilizing of denitrifying Bacillus sp. and TiO2–AgNPs on floating expanded clay carrier for co-treatment of nitrite and pathogens in aquaculture
Source: Royal Society of Chemistry journal article supplement (doi:10.1039/d3ra07361k), 2024-01-01
Supplement: d3ra07361k1.pdf [file d3ra07361k1.pdf]

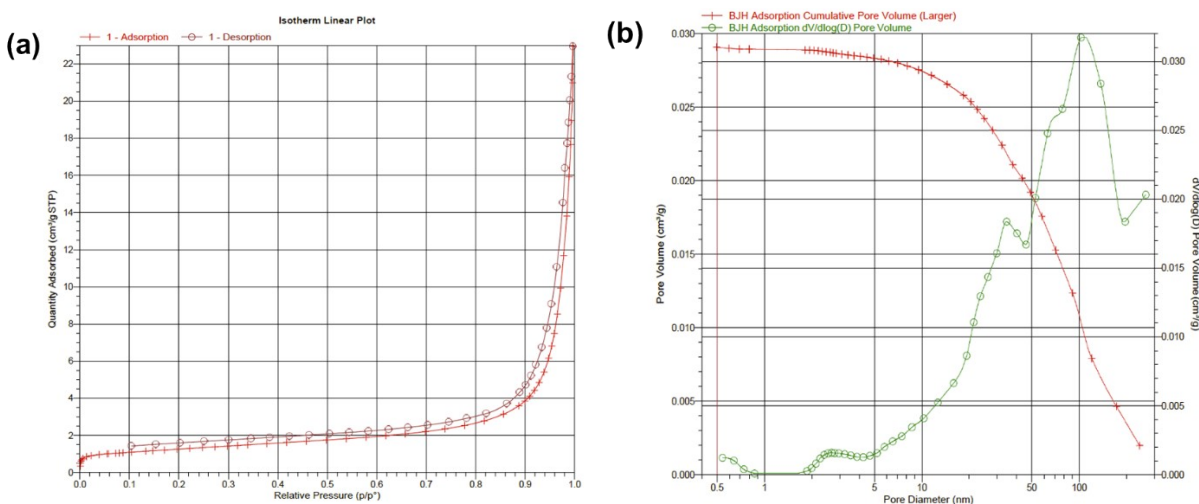

**Fig. S1.** Nitrogen adsorption –desorption isotherms (a), and Pore size distributions (b) of the as-fabricated EC

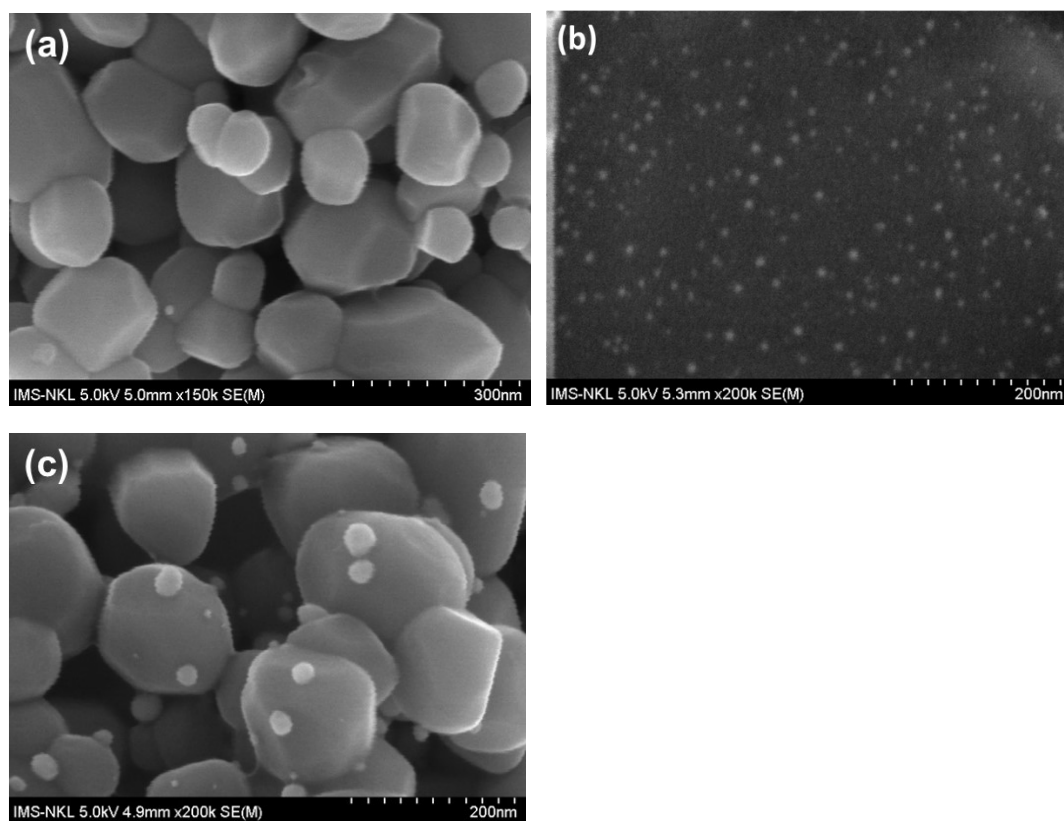

**Fig. S2.** FESEM images of the TiO<sub>2</sub>NPs (a), AgNPs (b) and TiO<sub>2</sub>-AgNPs (c).

**Table S1.** Properties of the synthesized TiO<sub>2</sub>, Ag and TiO<sub>2</sub>-Ag nanoparticles.

|                      | Size (nm)      | Zeta potential (mV) | Concentration (ppm)                      |
|----------------------|----------------|---------------------|------------------------------------------|
| TiO <sub>2</sub>     | 97.75 ± 11.06  | -47.2 ± 6.42        | 4976.82 ± 45.20                          |
| Ag                   | 25.29 ± 3.61   | -35.51 ± 13.10      | 185.49 ± 14.63                           |
| TiO <sub>2</sub> -Ag | 458.90 ± 18.51 | -43.70 ± 1.12       | Ti: 4852.51 ± 23.72<br>Ag: 194.58 ± 6.29 |

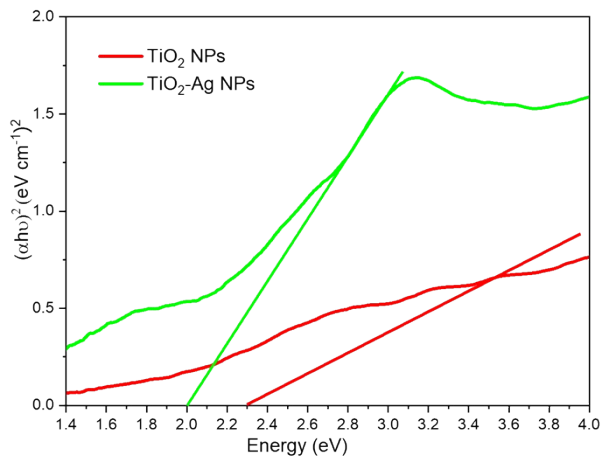

**Fig. S3.** band gap energy of TiO<sub>2</sub>-AgNPs

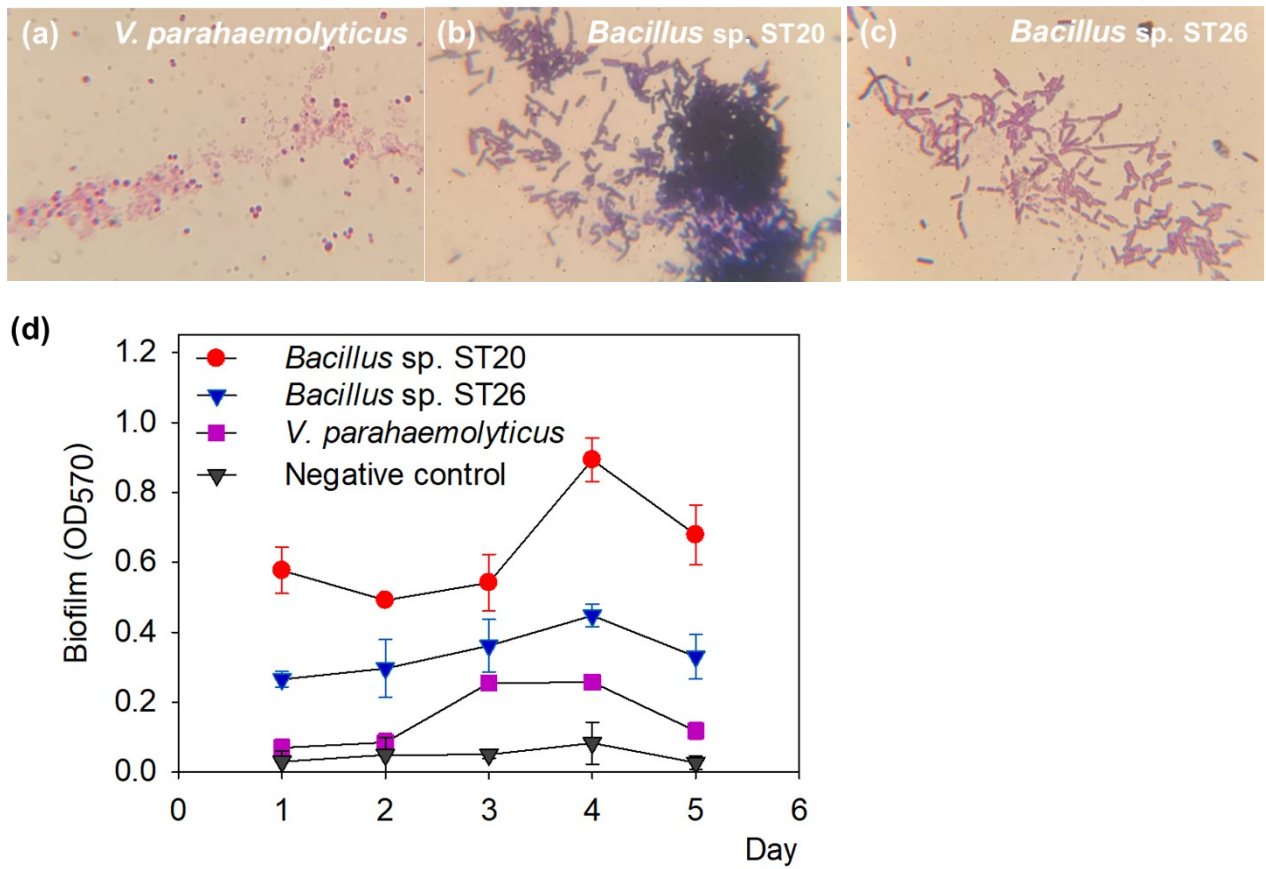

**Fig. S4.** Gram identification of *V. parahaemolyticus* pathogen (a), denitrifying *Bacillus* sp. ST20 (b), denitrifying *Bacillus* sp. ST26 (c) and bacteria biofilm-forming capacity (d). For panels a, b, and c, the cells that appeared in pink color belongs to the Gram-negative group while the cells stained violet belonged to the Gram-positive group.
